# Supplementary material
Source: ML conference proceedings conference paper supplement (https://proceedings.neurips.cc/paper_files/paper/2014/hash/b7087c1f4f89e63af8d46f3b20271153-Abstract.html)
Supplement: Supplementary file [file b7087c1f4f89e63af8d46f3b20271153-Supplemental.zip]

---

# Supplement to “Cone-Constrained Principal Component Analysis”

---

**Yash Deshpande**  
Electrical Engineering  
Stanford University

**Andrea Montanari**  
Electrical Engineering and Statistics  
Stanford University

**Emile Richard**  
Electrical Engineering  
Stanford University

The supplement is organized as follows. In Section 1 we give an overview of the setting considered in the main article, the notation used and cover some useful general facts. In Sections 2, 3 and 4 we provide the proofs of Theorems 1 2 and 3 of the main article.

## 1 Preliminaries

Recall the setting in Problem (3) in the main article, we let  $\mathbf{X} \in \mathbb{R}^{n \times n}$  be a symmetric matrix and  $\mathcal{C}_n \subseteq \mathbb{R}^n$  be a closed cone (not necessarily convex). We consider the following optimization problem:

$$\begin{aligned} & \text{maximize } \langle \mathbf{v}, \mathbf{X}\mathbf{v} \rangle, \\ & \text{subject to } \mathbf{v} \in \mathcal{C}_n, \quad \|\mathbf{v}\|_2 = 1. \end{aligned} \tag{1}$$

We denote by  $\lambda_{\max}(\mathbf{X}; \mathcal{C}_n)$  the value of this problem. For instance  $\lambda_{\max}(\mathbf{X}; \mathbb{R}^n)$  is the largest eigenvalue of  $\mathbf{X}$ . Note that this optimization problem is –in general– NP-hard. We denote by  $\mathcal{C}_n^*$  the dual cone of  $\mathcal{C}_n$ :

$$\mathcal{C}_n^* = \{\mathbf{z} : \forall \mathbf{v} \in \mathcal{C}_n, \langle \mathbf{z}, \mathbf{v} \rangle \geq 0\},$$

and by  $\mathcal{C}_n^\circ$  its polar cone  $\mathcal{C}_n^\circ = -\mathcal{C}_n^*$ .

Further, we let  $\mathcal{C}_{n,\mathbf{x}} = \text{cone}\{\mathbf{y} - \mathbf{x} : \mathbf{y} \in \mathcal{C}_n\}$  be the tangent cone of  $\mathcal{C}_n$  at  $\mathbf{x} \in \mathcal{C}_n$  (in particular  $\mathcal{C}_{n,0} = \mathcal{C}_n$ ), and  $\mathcal{C}_{n,\mathbf{x}}^*$  its dual (i.e.  $\mathcal{C}_{n,\mathbf{x}}^* = (\mathcal{C}_{n,\mathbf{x}})^*$ ). Finally, we let  $\mathbb{S}^{n-1} = \{\mathbf{x} : \|\mathbf{x}\|_2 = 1\}$  be the unit sphere in  $n$  dimensions.

Given a closed convex set  $K \subseteq \mathbb{R}^n$ , we let  $P_K : \mathbb{R}^n \rightarrow \mathbb{R}^n$  denote the orthogonal projection onto  $K$ . Given vectors  $\mathbf{v}_1, \mathbf{v}_2, \dots$ ,  $\text{span}(\mathbf{v}_1, \mathbf{v}_2, \dots)$  denotes their linear span. For a linear subspace  $V$ ,  $V^\perp$  denotes its orthogonal complement.

The following definitions will be useful in the sequel.

**Definition 1.1.** A local maximum of the problem (1) is a point  $\mathbf{v}^* \in \mathcal{C}_n \cap \mathbb{S}^{n-1}$ ,  $\|\mathbf{v}^*\|_2 = 1$  for which there exists an  $\varepsilon > 0$  such that  $\langle \mathbf{v}, \mathbf{X}\mathbf{v} \rangle \leq \langle \mathbf{v}^*, \mathbf{X}\mathbf{v}^* \rangle$  for all  $\mathbf{v} \in \mathcal{C}_n \cap \mathbb{S}^{n-1}$  within a neighborhood of  $\mathbf{v}^*$ :  $\|\mathbf{v} - \mathbf{v}^*\|_2 \leq \varepsilon$ .

**Definition 1.2.** Let  $\mathcal{C}_n$  be a closed convex cone. For any  $\mathbf{x} \in \mathbb{R}^n$ , the Moreau decomposition of  $\mathbf{x}$  is defined as  $\mathbf{x} = P_{\mathcal{C}_n}(\mathbf{x}) + P_{\mathcal{C}_n^\circ}(\mathbf{x})$ . Further we have that  $\langle P_{\mathcal{C}_n}(\mathbf{x}), P_{\mathcal{C}_n^\circ}(\mathbf{x}) \rangle = 0$ .

### 1.1 General facts

Let  $\mathbf{v}^*$  denote a local maximizer of (1). We begin with the following remark that characterizes the tangent cone at a local maximizer.

**Remark 1.3.** We have that  $\langle \mathbf{v}^*, \mathbf{v} \rangle = 0$  for all  $\mathbf{v} \in \mathcal{C}_{n,\mathbf{v}^*}^*$ .

*Proof.* If  $\mathbf{v}^* = 0$ , the result is trivial. If  $\mathbf{v}^* \neq 0$ , we have that  $\mathbf{v}^* - \mathbf{v}^* = 0 \in \mathcal{C}_n$  and  $\mathbf{v}^* - (-\mathbf{v}^*)2\mathbf{v}^* \in \mathcal{C}_n$ . Hence  $\{\mathbf{v}^*, -\mathbf{v}^*\} \subseteq \mathcal{C}_{n,\mathbf{v}^*}$  and as a consequence for  $\mathbf{v} \in \mathcal{C}_{n,\mathbf{v}^*}^*$ ,  $\langle \mathbf{v}^*, \mathbf{v} \rangle \geq 0$  and  $\langle -\mathbf{v}^*, \mathbf{v} \rangle \geq 0$  imply  $\langle \mathbf{v}^*, \mathbf{v} \rangle = 0$ .  $\square$

The following proposition characterizes the value at the local maxima of Problem (1).

**Proposition 1.4.** *If the point  $\mathbf{v}^* \in \mathcal{C}_n \cap \mathbb{S}^{n-1}$  is a local maximum of the problem (1), then there exists  $\boldsymbol{\mu}^* \in \mathcal{C}_{n,\mathbf{v}^*}^*$  and  $\lambda^* \in \mathbb{R}$  such that*

$$\mathbf{X}\mathbf{v}^* = \lambda^* \mathbf{v}^* - \boldsymbol{\mu}^*, \quad (2)$$

$$\lambda^* \geq \sup \left\{ \langle \mathbf{v}, \mathbf{X}\mathbf{v} \rangle : \mathbf{v} \in \mathcal{C}_{n,\mathbf{v}^*} \cap \text{span}(\boldsymbol{\mu}^*)^\perp, \|\mathbf{v}\|_2 = 1 \right\}. \quad (3)$$

*Vice-versa, if the above conditions (2), (3) hold for some  $\mathbf{v}^* \in \mathcal{C}_n \cap \mathbb{S}^{n-1}$  with the last inequality being strict, then  $\mathbf{v}^*$  is a local maximum. Further, if  $\mathcal{C}_n$  is convex Eq. (2) is the Moreau decomposition of  $\mathbf{X}\mathbf{v}^*$  with respect to  $\mathcal{C}_n$ . In particular*

$$\lambda^* \mathbf{v}^* = \text{P}_{\mathcal{C}_{n,\mathbf{v}^*}}(\mathbf{X}\mathbf{v}^*) = \text{P}_{\mathcal{C}_n}(\mathbf{X}\mathbf{v}^*), \quad \boldsymbol{\mu}^* = -\text{P}_{\mathcal{C}_{n,\mathbf{v}^*}^\circ}(\mathbf{X}\mathbf{v}^*) = -\text{P}_{\mathcal{C}_n^\circ}(\mathbf{X}\mathbf{v}^*). \quad (4)$$

*Proof.* Note that, for any  $\mathbf{v} \in \text{relint}(\mathcal{C}_{n,\mathbf{v}^*})$  and  $\varepsilon \geq 0$  we know that  $\varepsilon \mathbf{v} \in \mathcal{C}_{n,\mathbf{v}^*}$ . Therefore, by definition of the tangent cone,  $\mathbf{v}(\varepsilon) \equiv \mathbf{v}^* + \varepsilon \mathbf{v} \in \mathcal{C}_n$ . Then by local optimality of  $\mathbf{v}^*$ , for all  $\varepsilon$  small enough we have

$$\langle \mathbf{v}(\varepsilon), \mathbf{X}\mathbf{v}(\varepsilon) \rangle \leq \langle \mathbf{v}^*, \mathbf{X}\mathbf{v}^* \rangle \|\mathbf{v}(\varepsilon)\|^2.$$

Expanding both sides and letting  $\lambda^* = \langle \mathbf{v}^*, \mathbf{X}\mathbf{v}^* \rangle$ , we get

$$\begin{aligned} 2\varepsilon \langle \mathbf{v}, \mathbf{X}\mathbf{v}^* \rangle + \varepsilon^2 \langle \mathbf{v}, \mathbf{X}\mathbf{v} \rangle &\leq 2\lambda^* \varepsilon \langle \mathbf{v}^*, \mathbf{v} \rangle + \varepsilon^2 \lambda^* \|\mathbf{v}\|^2 \\ \text{whence } \langle \mathbf{v}, \mathbf{X}(\mathbf{v}^* - \lambda^* \mathbf{v}^*) \rangle &\leq \frac{\varepsilon}{2} (\|\mathbf{v}\|^2 - \langle \mathbf{v}, \mathbf{X}\mathbf{v} \rangle). \end{aligned} \quad (5)$$

With  $\boldsymbol{\mu}^* \equiv -\mathbf{X}\mathbf{v}^* + \lambda^* \mathbf{v}^*$ , and taking  $\varepsilon \rightarrow 0$  we obtain:

$$\langle \mathbf{v}, \boldsymbol{\mu}^* \rangle \geq 0 \quad \text{for all } \mathbf{v} \in \text{relint}(\mathcal{C}_{n,\mathbf{v}^*})$$

Since  $\mathcal{C}_n$  is closed, so is  $\mathcal{C}_{n,\mathbf{v}^*}$  and hence the above holds for every  $\mathbf{v} \in \mathcal{C}_{n,\mathbf{v}^*}$ . This implies that  $\boldsymbol{\mu}^* \in \mathcal{C}_{n,\mathbf{v}^*}^*$ . To prove Eq. (3) use  $\mathbf{v} \in \mathcal{C}_{n,\mathbf{v}^*} \cap \text{span}(\boldsymbol{\mu}^*)^\perp$  in Eq. (5).

Before proving the converse, we consider first the case when  $\mathcal{C}_n$  is convex. By convexity of  $\mathcal{C}_n$ , we have that  $\mathcal{C}_n \subseteq \mathcal{C}_{n,\mathbf{v}^*}$ . Further since  $\mathbf{v}^* \in \mathcal{C}_n$ , we have that  $\text{P}_{\mathcal{C}_{n,\mathbf{v}^*}}(\mathbf{X}\mathbf{v}^*) = \text{P}_{\mathcal{C}_n}(\mathbf{X}\mathbf{v}^*)$ . Also, Remark 1.3 implies  $\langle \boldsymbol{\mu}^*, \mathbf{v}^* \rangle = 0$ . Together, these imply the Moreau decomposition claim.

In order to prove the converse, let  $\mathbf{v} \in \mathcal{C}_n \cap \mathbb{S}^{n-1}$  and note that –as a consequence  $\mathbf{w} \equiv \mathbf{v} - \mathbf{v}^* \in \mathcal{C}_{n,\mathbf{v}^*}$  with  $2\langle \mathbf{w}, \mathbf{v}^* \rangle = -\|\mathbf{w}\|_2^2$ . We then have

$$\begin{aligned} \langle \mathbf{v}, \mathbf{X}\mathbf{v} \rangle - \langle \mathbf{v}^*, \mathbf{X}\mathbf{v}^* \rangle &= 2\langle \mathbf{w}, \mathbf{X}\mathbf{v}^* \rangle + \langle \mathbf{w}, \mathbf{X}\mathbf{w} \rangle \\ &= 2\langle \mathbf{w}, \lambda^* \mathbf{v}^* - \boldsymbol{\mu}^* \rangle + \langle \mathbf{w}, \mathbf{X}\mathbf{w} \rangle \\ &= -2\langle \boldsymbol{\mu}^*, \mathbf{w} \rangle + \langle \mathbf{w}, (A - \lambda^* \mathbf{I}) \mathbf{w} \rangle. \end{aligned} \quad (6)$$

Letting  $\mathbf{M} = \mathbf{X} - \lambda^* \mathbf{I}$ , and  $V \equiv \text{span}(\boldsymbol{\mu}^*)^\perp$ , we know by assumption that  $\langle \mathbf{w}, \mathbf{M}\mathbf{w} \rangle \leq -2\Delta \|\mathbf{w}\|_2^2$  for all  $\mathbf{w} \in \mathcal{D} \equiv \mathcal{C}_{n,\mathbf{v}^*} \cap V$ , for some  $\Delta > 0$ . For a general  $\mathbf{w} \in \mathcal{C}_{n,\mathbf{v}^*}$ , let  $\mathbf{w}_0 \equiv \text{P}_{\mathcal{D}}(\mathbf{w})$  and  $\tilde{\mathbf{v}} \equiv \mathbf{w} - \mathbf{w}_0$ . We then have

$$\begin{aligned} \langle \mathbf{w}, \mathbf{M}\mathbf{w} \rangle &= \langle \mathbf{w}_0, \mathbf{M}\mathbf{w}_0 \rangle + 2\langle \tilde{\mathbf{v}}, \mathbf{M}\mathbf{w}_0 \rangle + \langle \tilde{\mathbf{v}}, \mathbf{M}\tilde{\mathbf{v}} \rangle \\ &\leq -2\Delta \|\mathbf{w}_0\|_2^2 + 2\|\mathbf{M}\|_2 \|\tilde{\mathbf{v}}\|_2 \|\mathbf{w}_0\|_2 + \|\mathbf{M}\|_2 \|\tilde{\mathbf{v}}\|_2^2 \\ &\leq -2\Delta \|\mathbf{w}_0\|_2^2 + \gamma \|\mathbf{M}\|_2 \|\mathbf{w}_0\|_2^2 + (1 + \gamma^{-1}) \|\mathbf{M}\|_2 \|\tilde{\mathbf{v}}\|_2^2, \end{aligned}$$

where the last inequality follows for any  $\gamma > 0$  by  $2ab \leq \gamma a^2 + b^2/\gamma$ . Setting  $\gamma = \Delta/\|\mathbf{M}\|_2$  and  $c = \|\mathbf{M}\|_2(1 + \gamma^{-1})$ , we get

$$\langle \mathbf{w}, \mathbf{M}\mathbf{w} \rangle \leq -\Delta \|\mathbf{w}_0\|_2^2 + c \|\tilde{\mathbf{v}}\|_2^2. \quad (7)$$

Now we claim that, for any  $\delta > 0$  there exists  $L = L(\mathcal{C}_{n,\mathbf{v}^*}, \boldsymbol{\mu}^*, \delta) \geq 0$  such that, for all  $\mathbf{w} \in \mathcal{C}_{n,\mathbf{v}^*}$ ,

$$\|\tilde{\mathbf{v}}\|_2^2 \leq \delta \|\mathbf{w}_0\|_2^2 + L \langle \boldsymbol{\mu}^*, \mathbf{w} \rangle^2. \quad (8)$$

Before proving this claim, let us show that it indeed implies the desired thesis. Setting  $\delta = \Delta/c$ , and  $\tilde{L} = cL(\mathcal{C}_{n,\mathbf{v}^*}, \boldsymbol{\mu}^*, \Delta/c)$ , we conclude from Eq. (7) that

$$\langle \mathbf{w}, \mathbf{M}\mathbf{w} \rangle \leq \tilde{L} \langle \boldsymbol{\mu}^*, \mathbf{w} \rangle^2.$$

Substituting this estimate in Eq. (6), we get

$$\langle \mathbf{v}, \mathbf{X} \mathbf{v} \rangle - \langle \mathbf{v}^*, \mathbf{X} \mathbf{v}^* \rangle \leq -2\langle \boldsymbol{\mu}^*, \mathbf{w} \rangle + \tilde{L}\langle \boldsymbol{\mu}^*, \mathbf{w} \rangle^2. \quad (9)$$

Hence, for all  $\mathbf{v}$  such that  $\|\mathbf{v} - \mathbf{v}^*\|_2 = \|\mathbf{w}\|_2 \leq 1/(\|\boldsymbol{\mu}^*\|_2 \tilde{L})$  we have  $0 \leq \langle \boldsymbol{\mu}^*, \mathbf{w} \rangle \leq 1/\tilde{L}$  and therefore

$$\langle \mathbf{v}, \mathbf{X} \mathbf{v} \rangle - \langle \mathbf{v}^*, \mathbf{X} \mathbf{v}^* \rangle \leq -\langle \boldsymbol{\mu}^*, \mathbf{w} \rangle \leq 0,$$

which completes our proof that  $\mathbf{v}^*$  is a local maximum.

We are left with the task of proving the claim (8). Notice that, by scaling both sides, it is sufficient to prove it under the additional assumption  $\|\mathbf{w}\|_2 = 1$ . Fix  $\delta > 0$  and assume by contradiction that the claim is false. Then, for each  $k \in \mathbb{N}$  there exists  $\mathbf{w}^{(k)} \in \mathcal{C}_{n, \mathbf{v}^*}$ ,  $\|\mathbf{w}^{(k)}\|_2 = 1$  such that, letting  $\mathbf{w}_0^{(k)} \equiv \mathcal{P}_{\mathcal{D}}(\mathbf{w}^{(k)})$  and  $\tilde{\mathbf{v}}^{(k)} \equiv \mathbf{w}^{(k)} - \mathbf{w}_0^{(k)}$  we get

$$\|\tilde{\mathbf{v}}^{(k)}\|_2^2 > \delta \|\mathbf{w}_0^{(k)}\|_2^2 + k\langle \boldsymbol{\mu}^*, \mathbf{w}^{(k)} \rangle^2. \quad (10)$$

Since  $\{\mathbf{w}^{(k)}\}$  is a subset of the compact set  $\mathcal{C}_{n, \mathbf{v}^*} \cap \mathbb{S}^{n-1}$ , we can assume (by passing to a convergent subsequence), that  $\mathbf{w}^{(k)} \rightarrow \mathbf{w}^{(\infty)}$ . Since  $\mathcal{C}_{n, \mathbf{v}^*} \cap \mathbb{S}^{n-1}$  is closed,  $\mathbf{w}^{(\infty)} \in \mathcal{C}_{n, \mathbf{v}^*} \cap \mathbb{S}^{n-1}$ . Further  $\langle \boldsymbol{\mu}^*, \mathbf{w}^{(\infty)} \rangle^2 \leq \lim_{k \rightarrow \infty} \|\tilde{\mathbf{v}}^{(k)}\|_2^2/k \leq \lim_{k \rightarrow \infty} 4/k = 0$ . Hence  $\mathbf{w}^{(\infty)} \in \mathcal{D}$  i.e.  $\mathbf{w}_0^{(\infty)} = \mathbf{w}^{(\infty)}$ ,  $\tilde{\mathbf{v}}^{(\infty)} = 0$ . Further taking the limit  $k \rightarrow \infty$  in (10) we get

$$\|\tilde{\mathbf{v}}^{(\infty)}\|_2^2 \geq \delta \|\mathbf{w}_0^{(\infty)}\|_2^2$$

i.e.  $0 \geq \delta$ . Since we chose  $\delta > 0$  this gives the desired contradiction.  $\square$

The above proof implies a quantitative bound on the radius of the neighborhood within which  $\mathbf{v}^*$  is an optimum.

**Corollary 1.5.** *Assume the conditions*

$$\begin{aligned} \mathbf{X} \mathbf{v}^* &= \lambda^* \mathbf{v}^* - \boldsymbol{\mu}^*, \\ \lambda^* - 2\Delta &\geq \sup \left\{ \langle \mathbf{v}, \mathbf{X} \mathbf{v} \rangle : \mathbf{v} \in \mathcal{C}_{n, \mathbf{v}^*} \cap \text{span}(\boldsymbol{\mu}^*)^\perp, \|\mathbf{v}\|_2 = 1 \right\}, \end{aligned}$$

hold, and further assume that  $L(\mathcal{C}_{n, \mathbf{v}^*}, \boldsymbol{\mu}^*, \delta) \geq 0$  is such that, for all  $\mathbf{w} \in \mathcal{C}_{n, \mathbf{v}^*}$ ,

$$\|\tilde{\mathbf{v}}\|_2^2 \leq \delta \|\mathbf{w}_0\|_2^2 + L\langle \boldsymbol{\mu}^*, \mathbf{w} \rangle^2.$$

Let  $\mathbf{M} = \mathbf{X} - \lambda^* \mathbf{I}$ ,  $c = \Delta \|\mathbf{M}\|_2 (\Delta + \|\mathbf{M}\|_2)$ , and  $\tilde{L} = c L(\mathcal{C}_{n, \mathbf{v}^*}, \boldsymbol{\mu}^*, \Delta/c)$ . Then  $\mathbf{v}^*$  is a global maximum of the optimization problem (1) within a neighborhood  $\text{Ball}(\mathbf{v}^*, 1/(\tilde{L}\|\boldsymbol{\mu}^*\|_2))$ .

## 2 Proof of Theorem 1

Recall the model assumptions for the data  $\mathbf{X}$ :

$$\mathbf{X} = \beta \mathbf{v}_0 \mathbf{v}_0^\top + \mathbf{Z}.$$

Here we assume that  $\mathbf{v}_0 \in \mathcal{C}_n \cap \mathbb{S}^{n-1}$  and  $\mathbf{Z}_{ij} \sim \mathcal{N}(0, 1/n)$  are independent, up to symmetry. We first define the following useful quantities:

**Definition 2.1.** For a cone  $\mathcal{C}_n \subseteq \mathbb{R}^n$  we define its normalized Gaussian width as:

$$\omega(\mathcal{C}_n) \equiv \frac{1}{\sqrt{n}} \mathbb{E} \left\{ \sup_{\mathbf{v} \in \mathcal{C}_n \cap \mathbb{S}^{n-1}} \langle \mathbf{g}, \mathbf{v} \rangle \right\},$$

where  $\mathbf{g} \sim \mathcal{N}(0, \mathbf{I}_n)$ .

**Definition 2.2.** For a cone  $\mathcal{C}_n \subseteq \mathbb{R}^n$ , we define its packing number  $N(\mathcal{C}_n, \varepsilon)$  as the size of the maximal subset  $X$  of  $\mathcal{C}_n \cap \mathbb{S}^{n-1}$  such that for every  $\mathbf{v}_1, \mathbf{v}_2 \in \mathcal{C}_n \cap \mathbb{S}^{n-1}$ ,  $\|\mathbf{v}_1 - \mathbf{v}_2\|_2 > \varepsilon$ .

We have the following useful facts:

**Lemma 2.3.** *There exist universal constants  $c_1, c_2$  such that:*

$$c_1 \sup_{\varepsilon} \varepsilon \sqrt{\log N(\mathcal{C}_n, \varepsilon)} \leq \sqrt{n} \omega(\mathcal{C}_n) \leq c_2 \inf_{\varepsilon \leq 1} \{2\sqrt{n}\varepsilon(1 + \sqrt{\log(2/\varepsilon)}) + (2 - \varepsilon)\sqrt{\log N(\mathcal{C}_n, \varepsilon)}\}.$$

*Proof.* The left hand inequality is the Sudakov minoration inequality. For the latter, we first employ Dudley inequality:

$$\sqrt{n} \omega(\mathcal{C}_n) \leq c_3 \int_0^\infty \sqrt{\log N(\mathcal{C}_n, \varepsilon)} d\varepsilon,$$

for a universal constant  $c_3$ . We know that the diameter of  $\mathbb{S}^{n-1}$  is 2. Further as  $\mathcal{C}_n \cap \mathbb{S}^{n-1} \subseteq \mathbb{S}^{n-1}$  using a standard volume packing argument for  $\mathbb{S}^{n-1}$  [] we have that:

$$N(\mathcal{C}_n, \varepsilon) \leq \left(1 + \frac{2}{\varepsilon}\right)^n.$$

Thus for any  $0 \leq \varepsilon \leq 1$ :

$$\sqrt{n} \omega(\mathcal{C}_n) \leq c_3 \left[ \int_0^\varepsilon \sqrt{n \log \left(1 + \frac{2}{u}\right)} du + \int_\varepsilon^2 \sqrt{N(\mathcal{C}_n, \varepsilon)} du \right].$$

We simplify the first integral:

$$\begin{aligned} \int_0^\varepsilon \sqrt{\log \left(1 + \frac{2}{u}\right)} du &\leq 2 \int_0^\varepsilon \sqrt{\log \left(\frac{2}{u}\right)} du \\ &= 2 \int_{\sqrt{\log(2/\varepsilon)}}^\infty (4y^2) \exp(-y^2) dy \\ &\leq 2\varepsilon \left(1 + \sqrt{\log \left(\frac{2}{\varepsilon}\right)}\right), \end{aligned}$$

using standard integration by parts. Since  $N(\mathcal{C}, \varepsilon)$  is monotone nonincreasing in  $\varepsilon$ , we have that the second integral is bound above by  $(2 - \varepsilon)N(\mathcal{C}_n, \varepsilon)$ . These estimates imply the thesis using the observation that  $\varepsilon$  is arbitrarily chosen. □

The following lemma is proved in [ALMT13].

**Lemma 2.4.** *For any closed convex cone:*

$$\omega(\mathcal{C}_n)^2 \leq \delta(\mathcal{C}_n) \leq \omega(\mathcal{C}_n)^2 + \frac{1}{n}.$$

We can now prove Theorem 1

*Proof of Theorem 1.* Let  $X$  denote a maximal  $\varepsilon$ -net of  $\mathcal{C}_n \cap \mathbb{S}^{n-1}$  as in Lemma 2.3, for  $\varepsilon$  to be fixed later in the proof. Hence, for any  $\mathbf{v}_i, \mathbf{v}_j \in X$  distinct, we have  $\|\mathbf{v}_i - \mathbf{v}_j\| > \varepsilon$  or, equivalently,  $\langle \mathbf{v}_i, \mathbf{v}_j \rangle < 1 - \varepsilon^2/2$ . Note that the maximality of  $X$  implies also that it is an  $\varepsilon$ -cover of  $\mathcal{C}_n \cap \mathbb{S}^{n-1}$ , i.e. for any  $\mathbf{v} \in \mathcal{C}_n \cap \mathbb{S}^{n-1}$   $\min_{\mathbf{v}' \in X} \|\mathbf{v} - \mathbf{v}'\| \leq \varepsilon$ .

Let  $\mathbf{v}_0$  be uniformly distributed in the set  $X$ . For an estimator  $\hat{\mathbf{v}}(\mathbf{X}) \in \mathcal{V}$ , we define  $G(\hat{\mathbf{v}}(\mathbf{X})) = \arg \min_{\mathbf{v} \in X} \|\hat{\mathbf{v}}(\mathbf{X}) - \mathbf{v}\|_2$ . We now bound the probability of the error event  $\{G(\hat{\mathbf{v}}(\mathbf{X})) \neq \mathbf{v}_0\}$ . By definition of  $G(\hat{\mathbf{v}}(\mathbf{X}))$ , the event  $G(\hat{\mathbf{v}}(\mathbf{X})) \neq \mathbf{v}_0$  implies that there exists  $\mathbf{v}_i \in X, \mathbf{v}_i \neq \mathbf{v}_0$  such that  $\|\hat{\mathbf{v}}(\mathbf{X}) - \mathbf{v}_i\|_2 \leq \|\hat{\mathbf{v}}(\mathbf{X}) - \mathbf{v}_0\|_2$ . This along with triangle inequality implies that  $\varepsilon < \|\mathbf{v}_i - \mathbf{v}_0\| \leq 2\|\hat{\mathbf{v}}(\mathbf{X}) - \mathbf{v}_0\|$ , i.e.  $\|\hat{\mathbf{v}}(\mathbf{X}) - \mathbf{v}_0\|_2 > \varepsilon/2$ . By Markov inequality we have:

$$\begin{aligned} \mathbb{P}\{G(\hat{\mathbf{v}}(\mathbf{X})) \neq \mathbf{v}_0\} &\leq \mathbb{P}\{\|\hat{\mathbf{v}}(\mathbf{X}) - \mathbf{v}_0\|_2 > \varepsilon/2\} \\ &\leq 4 \frac{\mathbb{E}\{\|\hat{\mathbf{v}}(\mathbf{X}) - \mathbf{v}_0\|_2^2\}}{\varepsilon^2} \\ &= \frac{8(1 - \mathbb{E}\{\langle \hat{\mathbf{v}}(\mathbf{X}), \mathbf{v}_0 \rangle\})}{\varepsilon^2} \\ &\leq \frac{8R(\hat{\mathbf{v}}(\mathbf{X}); \mathbf{v}_0)}{\varepsilon^2}, \end{aligned} \tag{11}$$

By Fano's inequality we have that:

$$\mathbb{P}\{G(\hat{\mathbf{v}}(\mathbf{X}) \neq \mathbf{v}_0) \geq 1 - \frac{\gamma + \log 2}{\log |X|},$$

where  $\gamma = \max_{x \neq x'} D(P_{\mathbf{v}} \| P_{\mathbf{v}'})$  where  $D(\cdot \| \cdot)$  is the Kullback-Liebler divergence and  $P_{\mathbf{v}}$  denotes the law of  $\mathbf{X}$  conditional on  $\mathbf{v}_0 = \mathbf{v}$ . Conditional on  $\mathbf{v}_0 = \mathbf{v}$ ,  $\mathbf{X}$  has mean  $\mathbf{v}\mathbf{v}^\top$  and has Gaussian entries with variance  $1/n$ . A standard calculation implies that:

$$\begin{aligned} D(P_{\mathbf{v}} \| P_{\mathbf{v}'}) &\leq n\beta^2 \|\mathbf{v}\mathbf{v}^\top - \mathbf{v}'\mathbf{v}'^\top\|_F^2 \\ &= 2n\beta^2 (1 - \langle \mathbf{v}, \mathbf{v}' \rangle)^2 \\ &\leq 2n\beta^2. \end{aligned}$$

We have using Lemma 2.3 that  $\log |X| \geq cn(\omega(\mathcal{C}_n) - 2\varepsilon(1 + \sqrt{\log(2/\varepsilon)}))^2$ . Combining this with Fano's inequality above and Eq.(11):

$$R(\hat{\mathbf{v}}(\mathbf{X}); \mathbf{v}_0) \geq \frac{\varepsilon^2}{8} \left( 1 - \frac{2\beta^2}{c(\omega(\mathcal{C}_n) - 2\varepsilon(1 + \sqrt{\log(2/\varepsilon)}))^2} \right).$$

Further, the minimax risk satisfies  $R(\mathcal{C}_n) \geq R(\hat{\mathbf{v}}(\mathbf{X}); \mathbf{v}_0)$  for some estimator  $\hat{\mathbf{v}}(\mathbf{X})$  and the above bound is uniformly true for all estimators. Using  $\varepsilon_* = 1/4\omega(\mathcal{C}_n)/\sqrt{\log(1/\omega(\mathcal{C}_n))}$  implies that  $2\varepsilon(1 + \sqrt{\log(2/\varepsilon)}) \leq \omega(\mathcal{C}_n)/2$ . Hence:

$$R(\mathcal{C}_n) \geq c' \frac{\omega(\mathcal{C}_n)^2}{\log(1/\omega(\mathcal{C}_n))},$$

when  $\beta \leq c''\omega(\mathcal{C}_n)$  for some universal constants  $c', c''$ . Applying Lemma 2.4 and the constraint  $\omega(\mathcal{C}_n) \geq \sqrt{2/n}$  implies the result for appropriately adjusted  $c', c''$ . □

### 3 Proof of Theorem 2

We first prove the following useful lemma based on standard Gaussian comparisons.

**Lemma 3.1.** *Assume that the noise  $\mathbf{Z}$  has i.i.d.  $N(0, 1/n)$  entries up to symmetry. Then, with probability at least  $1 - n^{-5}$*

$$\lambda_1(\mathbf{Z}; \mathcal{C}_n) \leq 2\sqrt{\delta(\mathcal{C}_n)} + \sqrt{\frac{10 \log n}{n}}. \quad (12)$$

*Proof.* We will apply the Sudakov-Fernique inequality (see e.g. [Vit00, Theorem 1]) to the two processes  $\{\mathbf{M}(\mathbf{v})\}, \{\mathbf{V}(\mathbf{v})\}$  indexed by  $x \in \mathcal{C}_n \cap \mathbb{S}^{n-1}$  defined as follows:

$$\mathbf{M}(\mathbf{v}) \equiv \langle \mathbf{v}, \mathbf{Z}\mathbf{v} \rangle \quad \text{and} \quad \mathbf{V}(\mathbf{v}) \equiv 2\langle \mathbf{v}, \mathbf{g} \rangle,$$

for a random vector  $\mathbf{g} \sim N(0, \mathbf{I}_n/n)$  and  $\mathbf{Z}$  being a standard normal matrix. Basic algebra gives for all  $\mathbf{v}$ ,  $\mathbb{E}\mathbf{M}(\mathbf{v}) = \mathbb{E}\mathbf{V}(\mathbf{v}) = 0$  and

$$\mathbb{E}\{[\mathbf{M}(\mathbf{v}_1) - \mathbf{M}(\mathbf{v}_2)]^2\} = \frac{4}{n}(1 - \langle \mathbf{v}_1, \mathbf{v}_2 \rangle^2), \quad \mathbb{E}\{[\mathbf{V}(\mathbf{v}_1) - \mathbf{V}(\mathbf{v}_2)]^2\} = \frac{8}{n}(1 - \langle \mathbf{v}_1, \mathbf{v}_2 \rangle).$$

Hence, by using the fact that for  $a \in [-1, 1]$ , the inequality  $1 - a^2 \leq 2(1 - a)$  holds, we get  $\mathbb{E}\{[\mathbf{M}(\mathbf{v}_1) - \mathbf{M}(\mathbf{v}_2)]^2\} \leq \mathbb{E}\{[\mathbf{V}(\mathbf{v}_1) - \mathbf{V}(\mathbf{v}_2)]^2\}$ . We conclude using Sudakov-Fernique comparison lemma that:

$$\mathbb{E} \max \{ \langle \mathbf{v}, \mathbf{Z}\mathbf{v} \rangle : \mathbf{v} \in \mathcal{C}_n \cap \mathbb{S}^{n-1} \} \leq 2 \mathbb{E} \max \{ \langle \mathbf{v}, \mathbf{g} \rangle : \mathbf{v} \in \mathcal{C}_n \cap \mathbb{S}^{n-1} \}$$

By using Proposition 10.1 from [ALMT13],  $\mathbb{E} \max \{ \langle \mathbf{v}, \mathbf{g} \rangle : \mathbf{v} \in \mathcal{C}_n \cap \mathbb{S}^{n-1} \} \leq \sqrt{\delta(\mathcal{C}_n)}$ , we get that

$$\mathbb{E}\lambda_1(\mathbf{Z}; \mathcal{C}_n) \leq 2\sqrt{\delta(\mathcal{C}_n)}. \quad (13)$$

By using the fact that  $\mathbf{Z} \mapsto \max \{ \langle \mathbf{v}, \mathbf{Z} \mathbf{v} \rangle : \mathbf{v} \in \mathcal{C}_n \cap \mathbb{S}^{n-1} \}$  is 1-Lipschitz and concentration inequality on  $\max \{ \langle \mathbf{v}, \mathbf{Z} \mathbf{v} \rangle : \mathbf{v} \in \mathcal{C}_n \cap \mathbb{S}^{n-1} \}$ , with probability at least  $1 - \exp\{-t^2 n/2\}$ , we have

$$\lambda_1(\mathbf{Z}; \mathcal{C}_n) \leq 2\sqrt{\delta(\mathcal{C}_n)} + t.$$

Take  $t = \sqrt{(10 \log n)/n}$  and the claim follows.  $\square$

We can now prove Theorem 2

*Proof.* By optimality of  $\hat{\mathbf{v}}^{\text{ML}}$ , we have

$$\begin{aligned} \langle \hat{\mathbf{v}}^{\text{ML}}, \mathbf{X} \hat{\mathbf{v}}^{\text{ML}} \rangle &\geq \langle \mathbf{v}_0, \mathbf{X} \mathbf{v}_0 \rangle = \beta + \langle \mathbf{v}_0, \mathbf{Z} \mathbf{v}_0 \rangle \\ &\geq \beta - \lambda_1(\mathbf{Z}, \mathcal{C}_n). \end{aligned}$$

On the other hand

$$\langle \hat{\mathbf{v}}^{\text{ML}}, \mathbf{X} \hat{\mathbf{v}}^{\text{ML}} \rangle = \beta \langle \mathbf{v}_0, \hat{\mathbf{v}}^{\text{ML}} \rangle^2 + \langle \hat{\mathbf{v}}^{\text{ML}}, \mathbf{Z} \hat{\mathbf{v}}^{\text{ML}} \rangle \leq \beta \langle \mathbf{v}_0, \hat{\mathbf{v}}^{\text{ML}} \rangle^2 + \lambda_{\max}(\mathbf{Z}; \mathcal{C}_n).$$

The claim that  $R_{\mathcal{C}_n}(\hat{\mathbf{v}}^{\text{ML}}; \mathcal{C}_n) \leq 4(\sqrt{\delta(\mathcal{C}_n)} + \varepsilon_n)/\beta$  follows simply by putting together the above inequalities along with the previous lemma for  $\lambda_{\max}(\mathbf{Z}; \mathcal{C}_n)$ .

For the other claim we have as above:

$$\begin{aligned} \langle \hat{\mathbf{v}}^{\text{ML}}, \mathbf{X} \hat{\mathbf{v}}^{\text{ML}} \rangle &\geq \beta + \langle \mathbf{v}_0, \mathbf{Z} \mathbf{v}_0 \rangle, \\ \langle \hat{\mathbf{v}}^{\text{ML}}, \mathbf{X} \hat{\mathbf{v}}^{\text{ML}} \rangle &= \beta \langle \mathbf{v}_0, \hat{\mathbf{v}}^{\text{ML}} \rangle^2 + \langle \hat{\mathbf{v}}^{\text{ML}}, \mathbf{Z} \hat{\mathbf{v}}^{\text{ML}} \rangle. \end{aligned}$$

Together, this implies:

$$\begin{aligned} \beta(1 - \langle \mathbf{v}_0, \hat{\mathbf{v}}^{\text{ML}} \rangle^2) &\leq \langle \mathbf{Z}, -\mathbf{v}_0 \mathbf{v}_0^{\text{T}} + \hat{\mathbf{v}}^{\text{ML}} (\hat{\mathbf{v}}^{\text{ML}})^{\text{T}} \rangle \\ &\leq \|\mathbf{Z}\|_2 \|\mathbf{v}_0 \mathbf{v}_0^{\text{T}} - \hat{\mathbf{v}}^{\text{ML}} (\hat{\mathbf{v}}^{\text{ML}})^{\text{T}}\|_*, \end{aligned}$$

where the last line follows from Holder's inequality and  $\|\cdot\|_*$  denotes the nuclear norm (or sum of singular values). Since  $\mathbf{v}_0 \mathbf{v}_0^{\text{T}} - \hat{\mathbf{v}}^{\text{ML}} (\hat{\mathbf{v}}^{\text{ML}})^{\text{T}}$  has rank at most two:

$$\begin{aligned} \|\mathbf{v}_0 \mathbf{v}_0^{\text{T}} - \hat{\mathbf{v}}^{\text{ML}} (\hat{\mathbf{v}}^{\text{ML}})^{\text{T}}\|_* &\leq \sqrt{2} \|\mathbf{v}_0 \mathbf{v}_0^{\text{T}} - \hat{\mathbf{v}}^{\text{ML}} (\hat{\mathbf{v}}^{\text{ML}})^{\text{T}}\|_F \\ &= 2\sqrt{1 - \langle \mathbf{v}_0, \hat{\mathbf{v}}^{\text{ML}} \rangle^2}. \end{aligned}$$

Thus we have:

$$1 - \langle \mathbf{v}_0, \hat{\mathbf{v}}^{\text{ML}} \rangle^2 \leq \frac{2\|\mathbf{Z}\|^2}{\beta^2}.$$

Using the fact that  $1 - a^2 \geq 1 - |a|$  when  $a \in [-1, 1]$ , we obtain the desired result for the risk  $R(\hat{\mathbf{v}}^{\text{ML}}; \mathcal{C}_n)$ .  $\square$

## 4 Proof of Theorem 3

Note that the problem (1) is unchanged (except for an additive constant in the objective function) if we replace  $\mathbf{X}$  with  $\mathbf{X}_\rho = \mathbf{X} + \rho \mathbf{I}$ . We will take advantage of this freedom and consider the modified iteration

$$\hat{\mathbf{v}}^{t+1} = \frac{\mathbf{P}_{\mathcal{C}}(\mathbf{u}^t)}{\|\mathbf{P}_{\mathcal{C}}(\mathbf{u}^t)\|_2}, \quad (14)$$

$$\mathbf{u}^t = \mathbf{X}_\rho \hat{\mathbf{v}}^t. \quad (15)$$

It is convenient to define

$$\boldsymbol{\mu}^{t+1} \equiv -\mathbf{P}_{\mathcal{C}_n^\circ}(\mathbf{X}_\rho \hat{\mathbf{v}}^t), \quad (16)$$

$$\lambda_{t+1} \equiv \|\mathbf{P}_{\mathcal{C}_n}(\mathbf{X}_\rho \hat{\mathbf{v}}^t)\|_2. \quad (17)$$

Then we have the identity

$$\mathbf{X}_\rho \hat{\mathbf{v}}^{t-1} = \lambda_t \hat{\mathbf{v}}^t - \boldsymbol{\mu}^t, \quad (18)$$

which is the Moreau's decomposition of  $\mathbf{X}_\rho \hat{\mathbf{v}}^{t-1}$ . In particular

$$\langle \hat{\mathbf{v}}^t, \boldsymbol{\mu}^t \rangle = 0. \quad (19)$$

**Lemma 4.1.** *With the above definitions we have*

$$\lambda_t = \lambda_{t+1} \langle \hat{\mathbf{v}}^{t+1}, \hat{\mathbf{v}}^{t-1} \rangle - \langle \boldsymbol{\mu}^{t+1}, \hat{\mathbf{v}}^{t-1} \rangle \quad (20)$$

$$\leq \lambda_{t+1} \langle \hat{\mathbf{v}}^{t+1}, \hat{\mathbf{v}}^{t-1} \rangle. \quad (21)$$

*Proof.* Taking the scalar product of both sides of Eq. (18) by  $\hat{\mathbf{v}}^t$  and using Eq. (19), together with the fact that  $\|\hat{\mathbf{v}}^t\|_2 = 1$  by construction, we get

$$\lambda_t = \langle \hat{\mathbf{v}}^t, \mathbf{X} \hat{\mathbf{v}}^{t-1} \rangle = \langle \hat{\mathbf{v}}^{t-1}, \mathbf{X} \hat{\mathbf{v}}^t \rangle \quad (22)$$

$$= \langle \hat{\mathbf{v}}^{t-1}, \lambda_{t+1} \hat{\mathbf{v}}^{t+1} - \boldsymbol{\mu}^{t+1} \rangle. \quad (23)$$

This proves Eq. (20). Equation (21) follows from  $\hat{\mathbf{v}}^{t-1} \in \mathcal{C}_n$ ,  $\boldsymbol{\mu}^{t+1} \in \mathcal{C}_n^*$ , which imply  $\langle \hat{\mathbf{v}}^{t-1}, \boldsymbol{\mu}^{t+1} \rangle \geq 0$ .  $\square$

**Lemma 4.2.** *For any  $t \geq 1$ , we have*

$$\rho + \lambda_{\min}(\mathbf{X}) \leq \lambda_t \leq \rho + \lambda_{\max}(\mathbf{X}).$$

*Proof.* For  $\mathbf{y} \in \mathcal{C}_n^\circ$ ,  $\max \{ \langle \mathbf{y}, \mathbf{z} \rangle : \mathbf{z} \in \mathcal{C}_n \cap \mathbb{S}^{n-1} \} = 0$  and  $P_{\mathcal{C}_n}(\mathbf{y}) = 0$ . For any  $\mathbf{y} \notin \mathcal{C}_n^\circ$ ,  $P_{\mathcal{C}_n}(\mathbf{y}) \neq 0$ , so by using Cauchy-Schwarz inequality, and the fact that  $P_{\mathcal{C}_n}(\mathbf{y}) / \|P_{\mathcal{C}_n}(\mathbf{y})\|_2 \in \mathcal{C}_n \cap \mathbb{S}^{n-1}$ ,

$$\|P_{\mathcal{C}_n}(\mathbf{y})\|_2 = \max \{ \langle \mathbf{y}, \mathbf{z} \rangle : \mathbf{z} \in \mathcal{C}_n \cap \mathbb{S}^{n-1} \}.$$

Then, since  $\hat{\mathbf{v}}^{t-1} \in \mathcal{C}_n \cap \mathbb{S}^{n-1}$ , we have

$$\lambda_t = \|P_{\mathcal{C}_n}(\mathbf{X}_\rho \hat{\mathbf{v}}^{t-1})\|_2 \geq \langle \hat{\mathbf{v}}^{t-1}, \mathbf{X}_\rho \hat{\mathbf{v}}^{t-1} \rangle,$$

which yields the desired lower bound by definition. The upper bound follows since  $\lambda_t \leq \|\mathbf{X}_\rho \hat{\mathbf{v}}^{t-1}\|_2$ .  $\square$

**Proposition 4.3.** *Assume  $\rho + \lambda_{\min}(\mathbf{X}) > 0$ . Then the sequence  $\{\lambda_t\}_{t \geq 0}$  is bounded and non-decreasing and therefore it has a limit*

$$\lambda_* = \lim_{t \rightarrow \infty} \lambda_t = \lim_{t \rightarrow \infty} \langle \hat{\mathbf{v}}^t, \mathbf{X}_\rho \hat{\mathbf{v}}^t \rangle. \quad (24)$$

*Further, if  $\hat{\mathbf{v}}_*$  is any sub-sequential limit of  $\{\hat{\mathbf{v}}^t\}_{t \geq 0}$  (i.e.  $\lim_{k \rightarrow \infty} \hat{\mathbf{v}}^{t(k)} = \hat{\mathbf{v}}_*$  for some sequence  $\{t(k)\}$ ) then it satisfies the stationarity condition*

$$\mathbf{X} \hat{\mathbf{v}}_* = (\lambda_* - \rho) \hat{\mathbf{v}}_* - \boldsymbol{\mu}_*. \quad (25)$$

*Proof.* The existence of the limit  $\lambda_*$  follows immediately from Lemma 4.1 and 4.2. Next multiplying the identity (18) by  $\hat{\mathbf{v}}^t$ , we get, using Cauchy-Schwartz,

$$\lambda_t = \langle \hat{\mathbf{v}}^t, \mathbf{X}_\rho \hat{\mathbf{v}}^{t-1} \rangle \leq \sqrt{\langle \hat{\mathbf{v}}^t, \mathbf{X}_\rho \hat{\mathbf{v}}^t \rangle \langle \hat{\mathbf{v}}^{t-1}, \mathbf{X}_\rho \hat{\mathbf{v}}^{t-1} \rangle}.$$

Multiplying Eq. (18) by  $\hat{\mathbf{v}}^{t-1}$ , we get  $\langle \hat{\mathbf{v}}^{t-1}, \mathbf{X} \hat{\mathbf{v}}^{t-1} \rangle \leq \lambda_t \langle \hat{\mathbf{v}}^t, \hat{\mathbf{v}}^{t-1} \rangle$  and, changing the iteration number,  $\langle \hat{\mathbf{v}}^t, \mathbf{X} \hat{\mathbf{v}}^t \rangle \leq \lambda_{t+1} \langle \hat{\mathbf{v}}^t, \hat{\mathbf{v}}^{t+1} \rangle$ . Substituting in the above, we obtain

$$\lambda_t \leq \lambda_{t+1} \langle \hat{\mathbf{v}}^t, \hat{\mathbf{v}}^{t-1} \rangle \langle \hat{\mathbf{v}}^t, \hat{\mathbf{v}}^{t+1} \rangle.$$

Since  $\lambda_t \rightarrow \lambda_*$ , we conclude that  $\langle \hat{\mathbf{v}}^t, \hat{\mathbf{v}}^{t-1} \rangle \rightarrow 1$  or

$$\lim_{t \rightarrow \infty} \|\hat{\mathbf{v}}^t - \hat{\mathbf{v}}^{t+1}\|_2 = 0.$$

Using this in the identity  $\lambda_t = \langle \hat{\mathbf{v}}^t, \mathbf{X}_\rho \hat{\mathbf{v}}^{t-1} \rangle$  derived above, we deduce that  $\langle \hat{\mathbf{v}}^t, \mathbf{X}_\rho \hat{\mathbf{v}}^t \rangle \rightarrow \lambda_*$ . Using it in Eq. (18) (with  $t = t(k)$  as per the statement) we get the stationarity condition (25).  $\square$

**Remark 4.4.** Corollary 4.1 follows directly from the proof of Theorem 3 and the Gaussian comparison lemma 3.1.

## References

- [ALMT13] D. Amelunxen, M. Lotz, M. McCoy, and J. Tropp, *Living on the edge: a geometric theory of phase transition in convex optimization*, submitted (2013).
- [Vit00] Richard A Vitale, *Some comparisons for gaussian processes*, Proceedings of the American Mathematical Society (2000), 3043–3046.
